# Supplementary material for: Effective treatment of 2,4,6-trinitrotoluene from aqueous media using a sono–photo-Fenton-like process with a zero-valent iron nanoparticle (nZVI) catalyst
Source: Royal Society of Chemistry journal article supplement (doi:10.1039/d4ra03907f), 2024-01-01
Supplement: d4ra03907f1.pdf [file d4ra03907f1.pdf]

## Supporting Information

### **Effective treatment of 2,4,6-Trinitrotoluen from aqueous media using Sono-Photo-Fenton-like process with zero-valent iron nanoparticles (nZVI) catalyst**

Hoang Van Nguyen<sup>a</sup>, Son Tung Pham<sup>a,\*</sup>, Toan Ngoc Vu<sup>a</sup>, Huong Van Nguyen<sup>a</sup>,  
Duong Duc La<sup>b,\*</sup>

---

<sup>a</sup>*Institute of New Technology, Hanoi, Vietnam.*

<sup>b</sup>*Institute of Chemistry and Materials, Hanoi, Vietnam.*

\* *Corresponding authors: [duc.duong.la@gmail.com](mailto:duc.duong.la@gmail.com),*

*[sontung231@gmail.com](mailto:sontung231@gmail.com)*

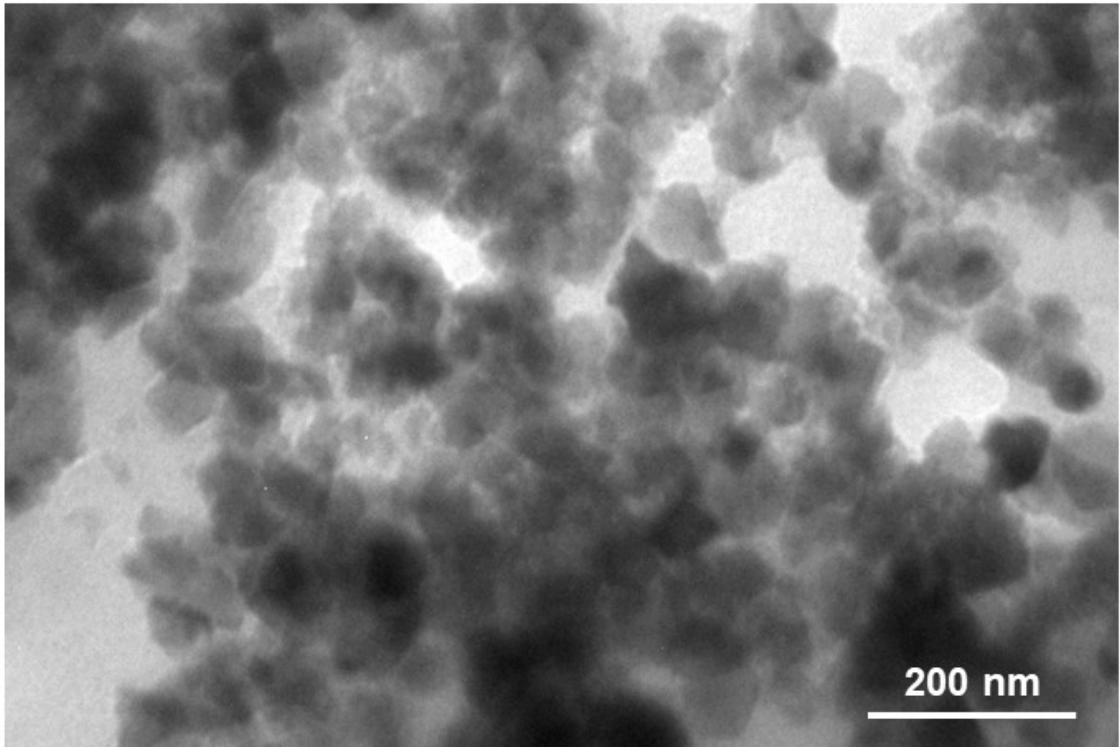

**Figure S1.** TEM image of nZVI nanoparticle

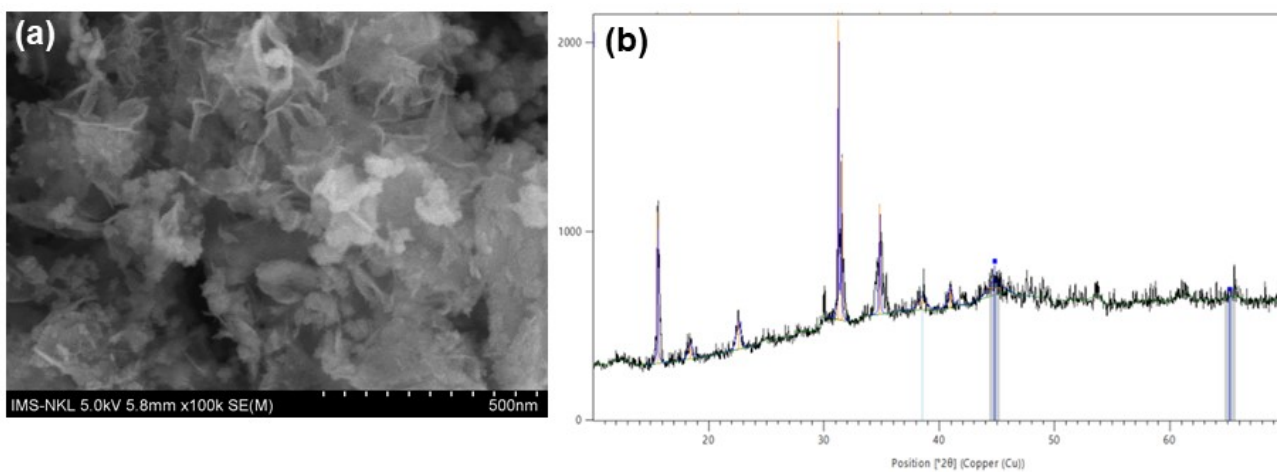

**Figure S2.** SEM image (a) and XRD pattern (b) of nZVI nanoparticles after treatment.

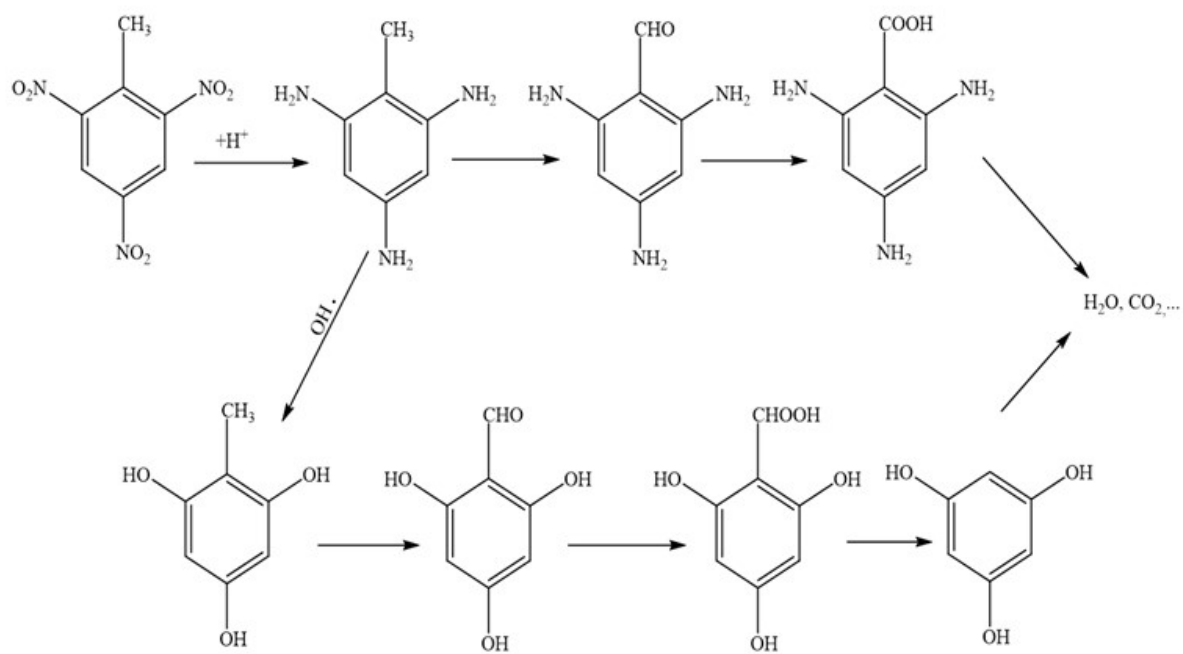

**Figure S3.** Proposed TNT degradation mechanism by sono-photo-fenton process combined with nZVI
